# Supplementary material for: A near-infrared fluorescent probe targeting mitochondria for sulfite detection and its application in food and biology
Source: Royal Society of Chemistry journal article supplement (doi:10.1039/d1ay00918d), 2021-01-01
Supplement: d1ay00918d1.pdf [file d1ay00918d1.pdf]

## Supporting information

### Contents:

#### 1. Materials and instruments

#### 2. Bioimaging

#### 3. Supplementary figures

**Fig. S1**  $^1\text{H}$  NMR spectra of **NIR-BN** in  $\text{DMSO-}d_6$

**Fig. S2**  $^{13}\text{C}$  NMR spectra of **NIR-BN** in  $\text{DMSO-}d_6$

**Fig. S3** HRMS spectra of **NIR-BN**

**Fig. S4** The specificity experiments of **NIR-BN-SO<sub>3</sub><sup>2-</sup>** for the reversible reaction of HCHO

**Fig. S5** The interference experiments of **NIR-BN** for  $\text{SO}_3^{2-}$

**Fig. S6** The pH response of **NIR-BN** for  $\text{SO}_3^{2-}$

**Fig. S7** The reaction time of **NIR-BN** (20  $\mu\text{M}$ ) for  $\text{SO}_3^{2-}$  (100  $\mu\text{M}$ )

**Fig. S8** HRMS spectra of **NIR-BN -SO<sub>3</sub><sup>2-</sup>**

## 1. Materials and instruments

All chemicals from Aladdin were used without further purification. In this experiment, the absorption and fluorescence spectra were measured using a UV-2450 ultraviolet spectrophotometer (Shimadzu, Japan) and F-7000 fluorescence spectrophotometer (Hitachi, Japan), respectively.  $^1\text{H}$  NMR and  $^{13}\text{C}$  NMR spectra were obtained by a Bruker AVANCE-600 MHz and 150 MHz NMR spectrometer, respectively (Bruker, Billerica, MA). A Thermo Scientific Q Exactive LC-MS/MS system was used for HRMS spectra. Cell imaging and zebrafish imaging experiments relied on a ZEISS LSM 880 confocal laser scanning microscope.

### 2.1 HeLa cell culture and imaging

HeLa cells were cultured in Dulbecco's modified Eagle's medium (DMEM) supplemented with 10% FBS and 0.25% trypsin at 37 °C and 5%  $\text{CO}_2$ . The cells were incubated on plates and allowed to grow for 24 h. Before the experiment, HeLa cells were washed three times with PBS (pH=7.4). First, the cells were incubated with **NIR-BN** (10  $\mu\text{M}$ ) for 15 min to observe the phenomenon, and then  $\text{SO}_3^{2-}$  (50  $\mu\text{M}$ ) was added and incubated for another 15 min. Secondly, the cells were incubated with GSH (500  $\mu\text{M}$ ) and  $\text{Na}_2\text{S}_2\text{O}_3$  (250  $\mu\text{M}$ ) for 1h, and then incubated with **NIR-BN** (10  $\mu\text{M}$ ) for 15 min. The fluorescence images of HeLa cells were obtained at the emission ranges of 650-710 nm ( $\lambda_{\text{ex}} = 561 \text{ nm}$ ).

### 2.2 Zebrafish culture and imaging

The zebrafish used in the experiment were purchased from Shanghai Feixi Biological Technology Co., Ltd. One group of zebrafish was cultured with 20  $\mu\text{M}$  **NIR-BN** for 30 min. The other group was treated with 20  $\mu\text{M}$  **NIR-BN** for 30 min, and then co-incubated with 100  $\mu\text{M}$   $\text{SO}_3^{2-}$  for further 30 min. The fluorescence images of zebrafish were obtained at the emission ranges of

650-710 nm ( $\lambda_{\text{ex}} = 561$  nm).

## 2. Supplementary figures

**Fig. S1**  $^1\text{H-NMR}$  spectrum of probe **NIR-BN** in  $\text{DMSO-}d_6$

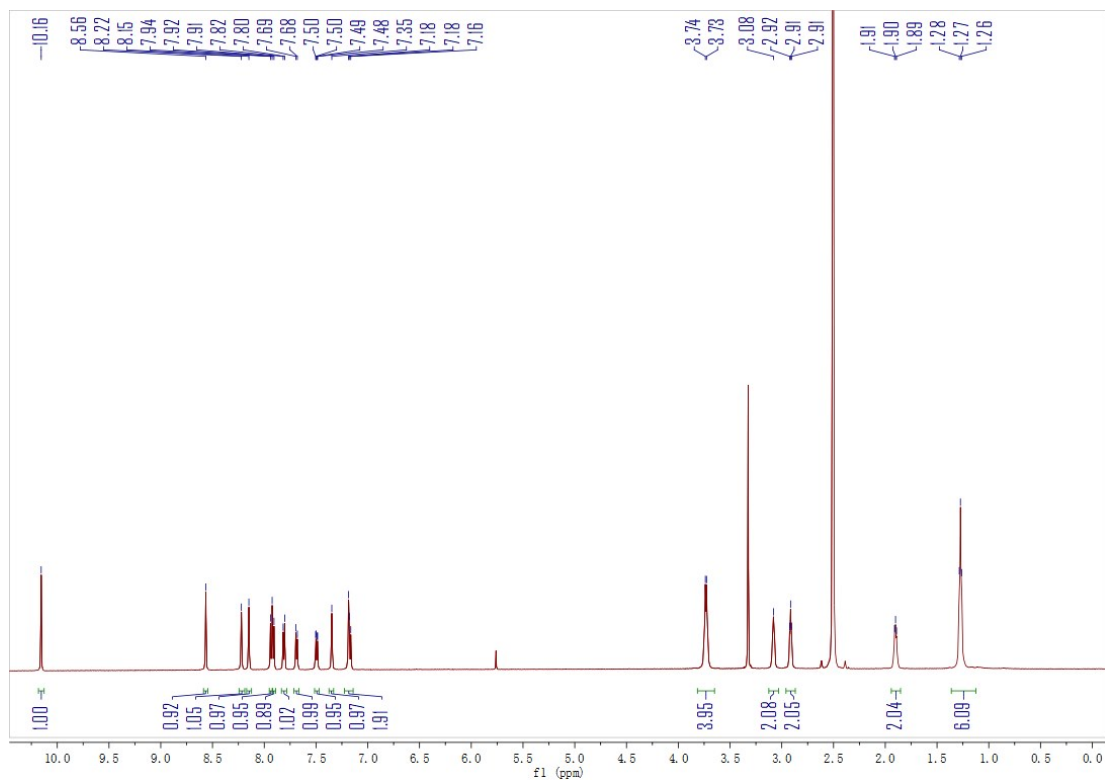

**Fig. S2**  $^{13}\text{C-NMR}$  spectrum of probe **NIR-BN** in  $\text{DMSO-}d_6$

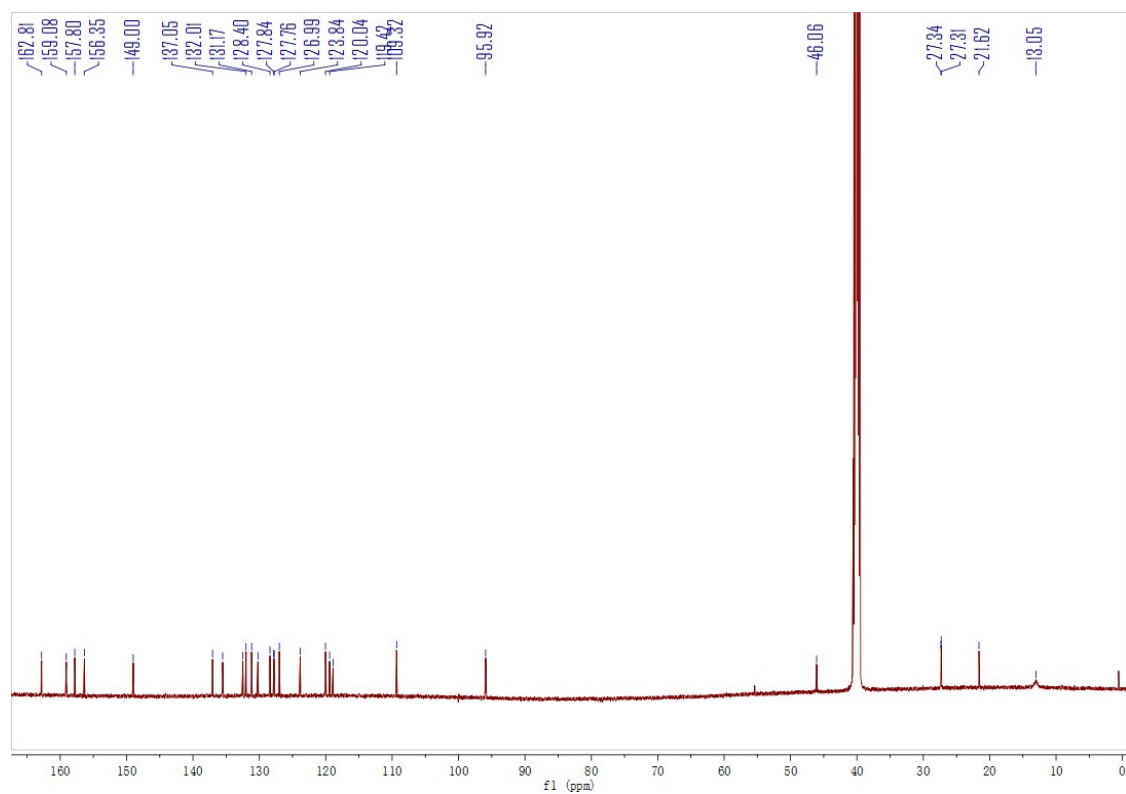

**Fig. S3** HRMS spectrum of NIR-BN

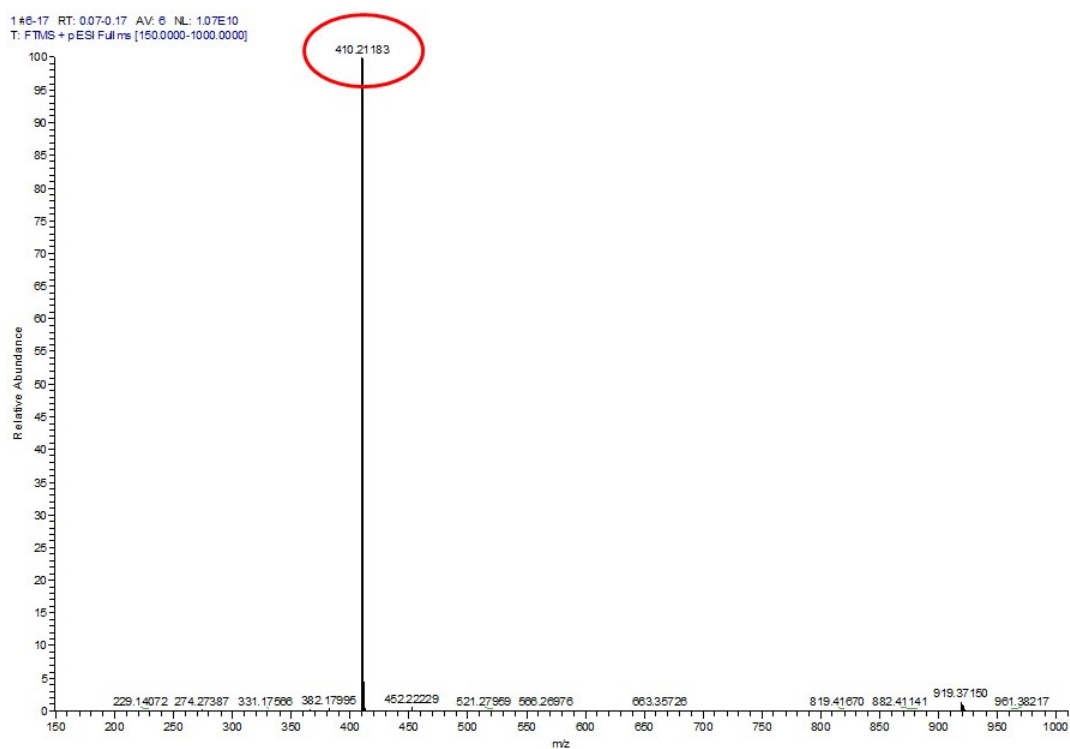

**Fig. S4** The specificity of NIR-BN-SO<sub>3</sub><sup>2-</sup> for the reversible reaction of HCHO (60 μM) in CH<sub>3</sub>CN/PBS (v/v, 2/8, pH= 7.4). (1) Probe NIR-BN, (2) HCHO, (3) Fe<sup>2+</sup>, (4) Cu<sup>2+</sup>, (5) H<sub>2</sub>O<sub>2</sub>, (6)

ClO<sup>-</sup>, (7) Al<sup>3+</sup>, (8) MnO<sub>4</sub><sup>-</sup>, (9) CH<sub>3</sub>COO<sup>-</sup>, (10) NO<sub>3</sub><sup>2-</sup>, (11) NO<sub>2</sub><sup>-</sup>, (12) K<sup>+</sup>.

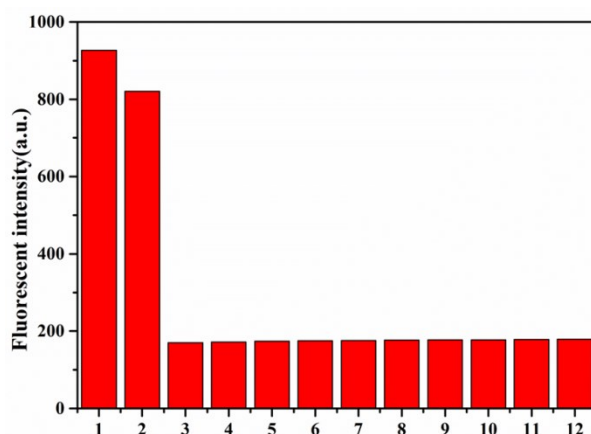

**Fig. S5** (a) The selectivity of **NIR-BN** for SO<sub>3</sub><sup>2-</sup>. (b) Fluorescence intensity of **NIR-BN** (20 μM) toward 100 μM SO<sub>3</sub><sup>2-</sup> in the presence of 100 μM interfering species each in CH<sub>3</sub>CN/PBS (v/v, 2/8, pH= 7.4). (1)probe **NIR-BN**, (2)SO<sub>4</sub><sup>2-</sup>, (3)S<sub>2</sub>O<sub>3</sub><sup>2-</sup>, (4) HS<sup>-</sup>, (5)Cys, (6)Hcy, (7)GSH, (8)Cl<sup>-</sup>, (9)Br<sup>-</sup>, (10)CO<sub>3</sub><sup>2-</sup>, (11)NO<sub>2</sub><sup>-</sup>, (12)CH<sub>3</sub>COO<sup>-</sup>, (13)NO<sub>3</sub><sup>2-</sup>,(14)H<sub>2</sub>O<sub>2</sub>, (15)ClO<sup>-</sup>, (16)SO<sub>3</sub><sup>2-</sup>.

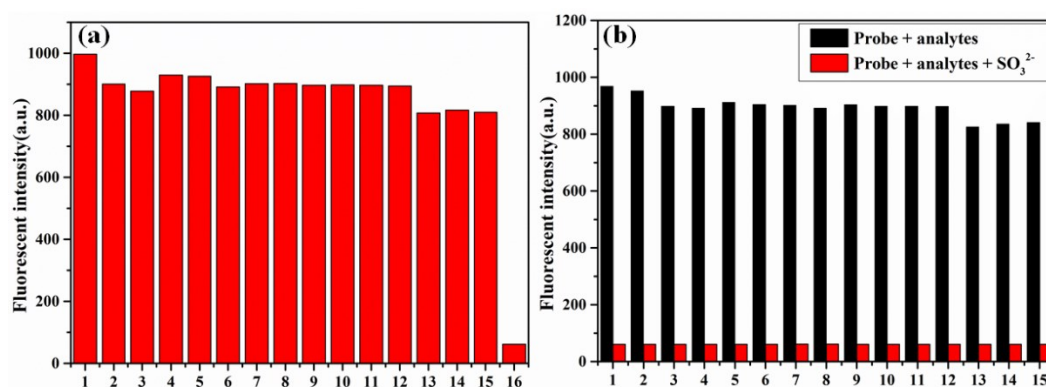

**Fig. S6** Fluorescence intensity of the **NIR-BN** (20 μM) at different pH values in the absence or presence of SO<sub>3</sub><sup>2-</sup> (20 μM) in CH<sub>3</sub>CN/PBS (v/v, 2/8, pH= 7.4).

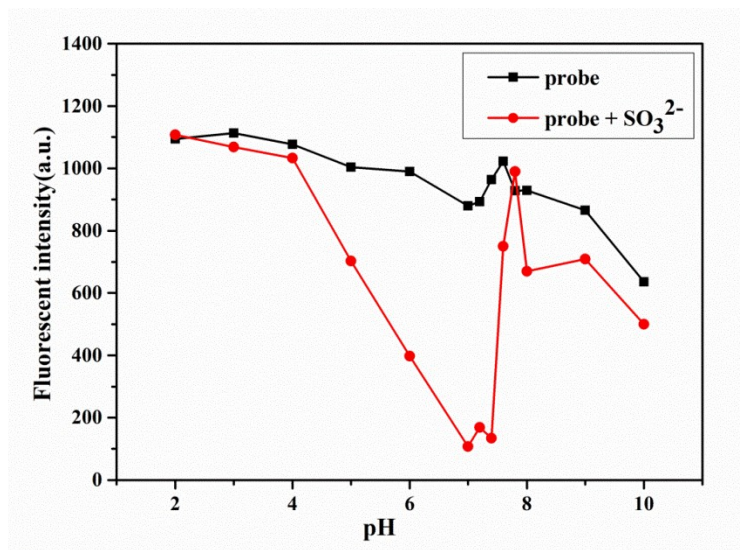

Fig. S7 The reaction time of NIR-BN (20  $\mu\text{M}$ ) for  $\text{SO}_3^{2-}$  (20  $\mu\text{M}$ )

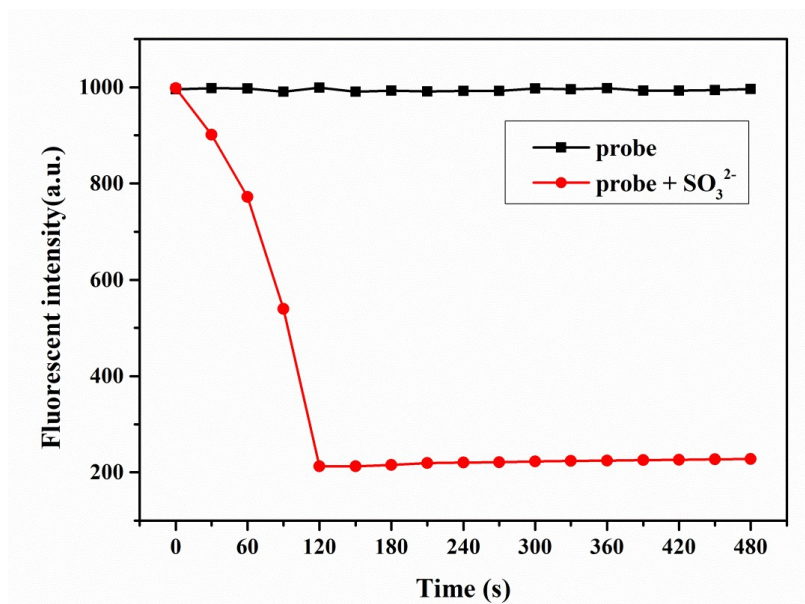

Fig. S8 HRMS spectra of NIR-BN- $\text{SO}_3^{2-}$

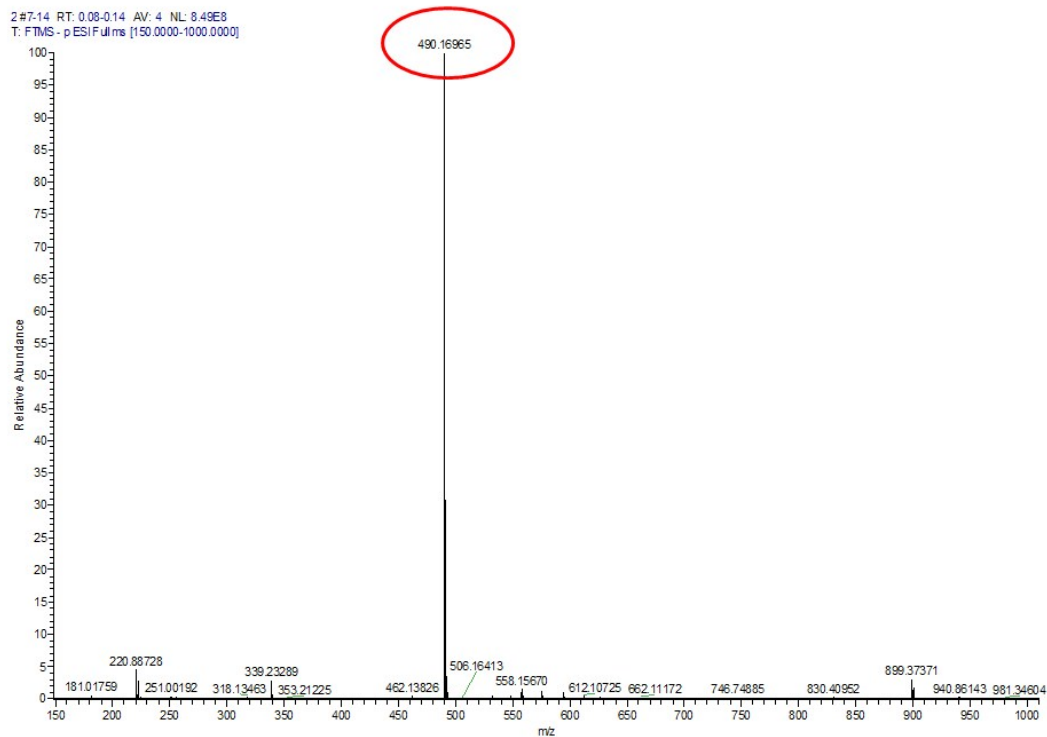

**Table S1.** Comparison of **NIR-BN** and other probes for  $\text{SO}_3^{2-}$  detection

| Refs. | Targeting mitochondria | $\lambda_{\text{ex}}/\lambda_{\text{em}}$ (nm) | Food application | Living cell imaging   | Detection limit | Time  |
|-------|------------------------|------------------------------------------------|------------------|-----------------------|-----------------|-------|
| 1     | Yes                    | 380/470,578                                    | No               | endogenous, exogenous | 40 nM           | 2 min |
| 2     | No                     | 360/430,520                                    | Yes              | exogenous             | 79.2 nM         | 60 s  |

|              |     |                 |     |                          |                     |       |
|--------------|-----|-----------------|-----|--------------------------|---------------------|-------|
| 3            | No  | 405/485,565     | No  | endogenous,<br>exogenous | 20 $\mu\text{M}$    | 1 min |
| 4            | No  | 404/467,587     | No  | endogenous,<br>exogenous | 0.21 $\mu\text{M}$  | 2 min |
| 5            | Yes | 405,561/534,634 | No  | exogenous                | 0.047 $\mu\text{M}$ | 8 min |
| 6            | Yes | 420/494,579     | No  | exogenous                | 299 nM              | 5 min |
| This<br>work | Yes | 580/680         | Yes | endogenous,<br>exogenous | 0.17 $\mu\text{M}$  | 2 min |

### Notes and references

1. D.S. Zhang, A.K. Liu, R.X. Ji, J. Dong, Y.Q. Ge, *Anal Chim Acta.*, 2019, **1055**, 133-139.
2. Q. Jiang, Z.L. Wang, M.X. Li, J. Song, Y.Q. Yang, X. Xu, H.J. Xu, S.F. Wang, *Dyes Pigm.*, 2019, **171**, 107702.
3. Q.L. Zhang, Z.Q. Cui, Q.F. Wang, G.X. Zheng, *Sens. Actuators B Chem.*, 2019, **295**, 79-85.
4. J. Nie, H. Sun, Y. Zhao, X. Dai, Z.H. Ni, *Spectrochim. Acta. A Mol. Biomol. Spectrosc.*, 2021, **247**, 119128.



5. Y.R. Lu, B.L. Dong, W.H. Song, Y.R. Sun, A.H. Mehmood, W.Y. Lin, *New J. Chem.*, 2020, **44**, 11988-11992.

6. J.W. Shi, W. Shu, Y. Tian, Y.L. Wu, J. Jing, R.B. Zhang, X.L. Zhang, *RSC Adv.*, 2019, **9**, 22348-22354.
